# Supplementary material for: Structure and Anti-Inflammatory Activity of a New Unusual Fucosylated Chondroitin Sulfate from Cucumaria djakonovi
Source: PubMed Central journal article supplement (PMC6212937; doi:10.3390/md16100389), 2018-10-17
Supplement: marinedrugs-16-00389-s001.pdf [file marinedrugs-16-00389-s001.pdf]

## Supplementary information

# Structure and Anti-Inflammatory Activity of a New Unusual Fucosylated Chondroitin Sulfate from *Cucumaria djakonovi*

Nadezhda E. Ustyuzhanina <sup>1,\*</sup>, Maria I. Bilan <sup>1</sup>, Elena G. Panina <sup>2</sup>, Nadezhda P. Sanamyan <sup>2</sup>, Andrey S. Dmitrenok <sup>1</sup>, Eugenia A. Tsvetkova <sup>1</sup>, Natalia A. Ushakova <sup>3</sup>, Alexander S. Shashkov <sup>1</sup>, Nikolay E. Nifantiev <sup>1</sup> and Anatolii I. Usov <sup>1,\*</sup>

<sup>1</sup> N.D. Zelinsky Institute of Organic Chemistry, Russian Academy of Sciences, Leninsky prospect 47, Moscow 119991, Russia; bilan@ioc.ac.ru (M.I.B.); dmt@ioc.ac.ru (A.S.D.); e\_tsvet@ioc.ac.ru (E.A.T.); shash@ioc.ac.ru (A.S.S.); nen@ioc.ac.ru (N.E.N.)

<sup>2</sup> Kamchatka Branch of Pacific Geographical Institute FEB RAS, Russian Academy of Sciences, Petropavlovsk-Kamchatsky 683000, Russia; panina1968@mail.ru (E.G.P.); actinaria@sanamyan.com (N.P.S.)

<sup>3</sup> V.N. Orekhovich Research Institute of Biomedical Chemistry, Pogodinskaya str. 10, Moscow 119121, Russia; natalia.ushakova@ibmc.msk.ru

\* Correspondence: ustnad@gmail.com (N.E.U.); usov@ioc.ac.ru (A.I.U.); Tel.: +7-495-135-8784 (N.E.U.)

**A**

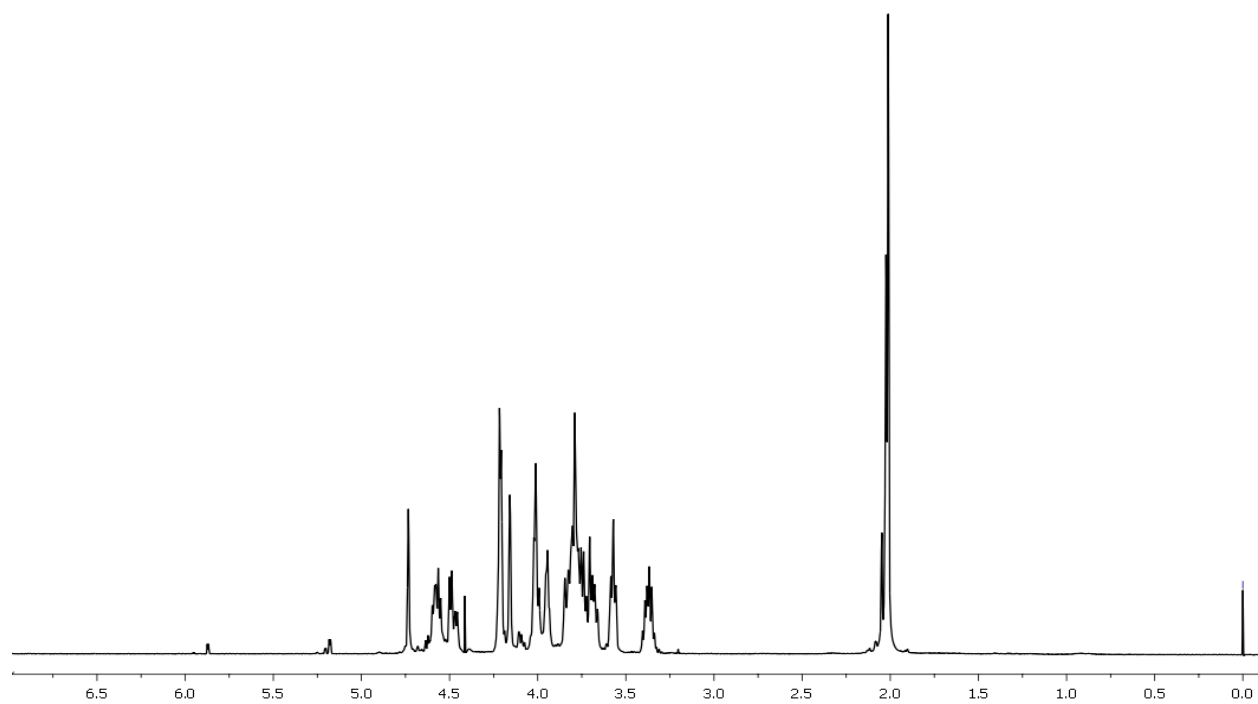

**B**

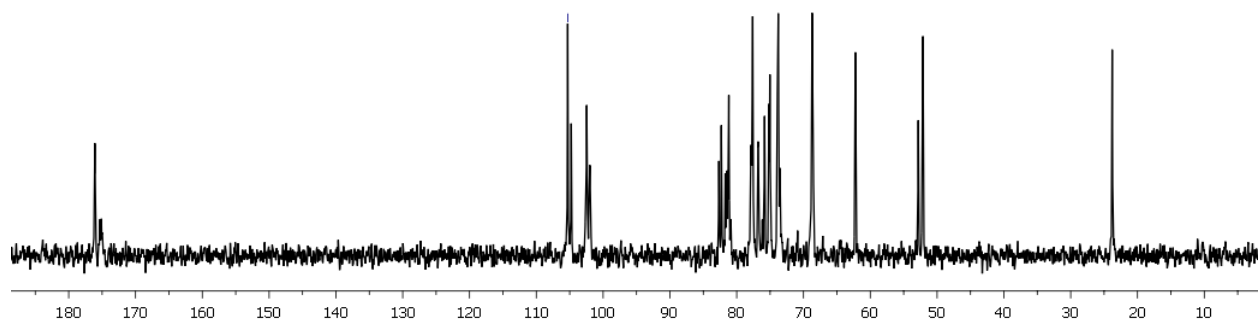

Figure S1. The  $^1\text{H}$  NMR (A) and  $^{13}\text{C}$  NMR (B) spectra of chondroitin sulfate SS.

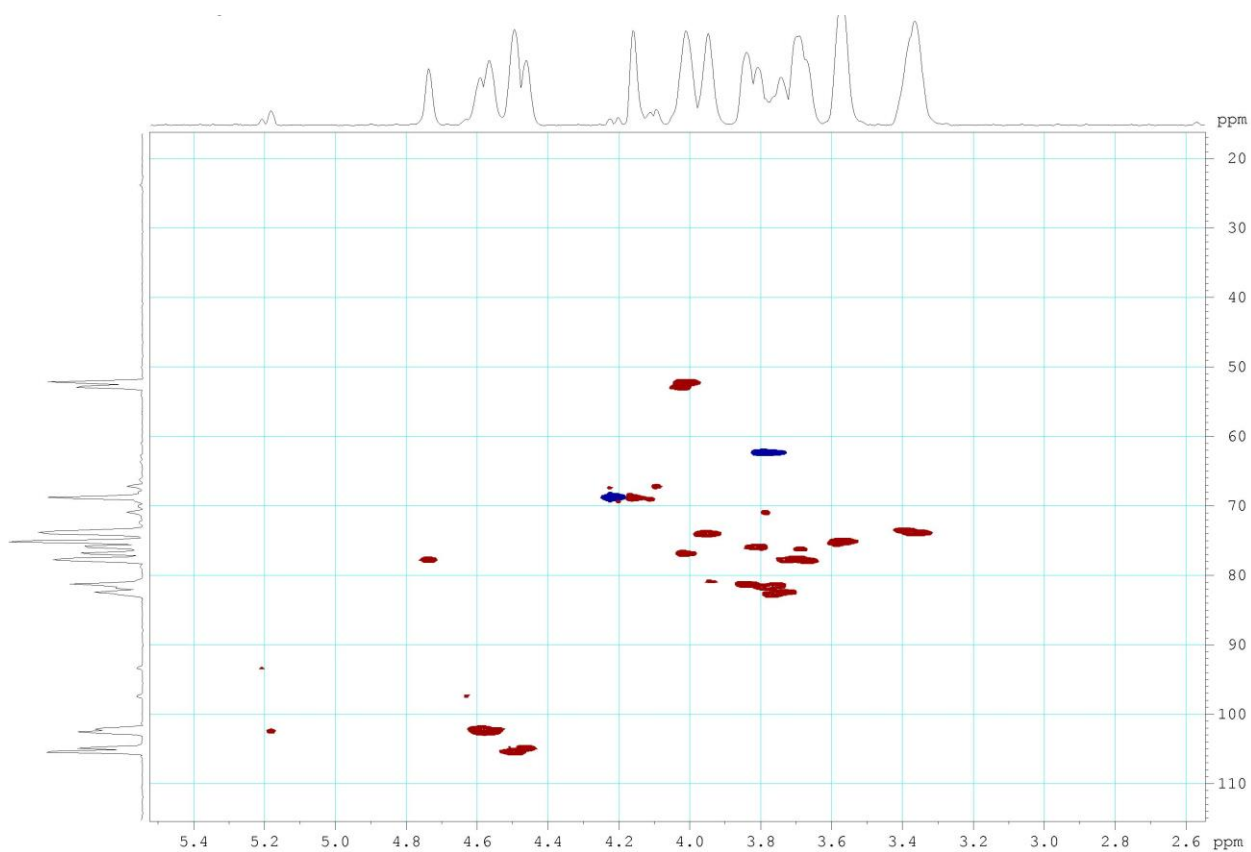

Figure S2. The  $^1\text{H}$ - $^{13}\text{C}$  HSQC NMR spectrum of chondroitin sulfate SS.

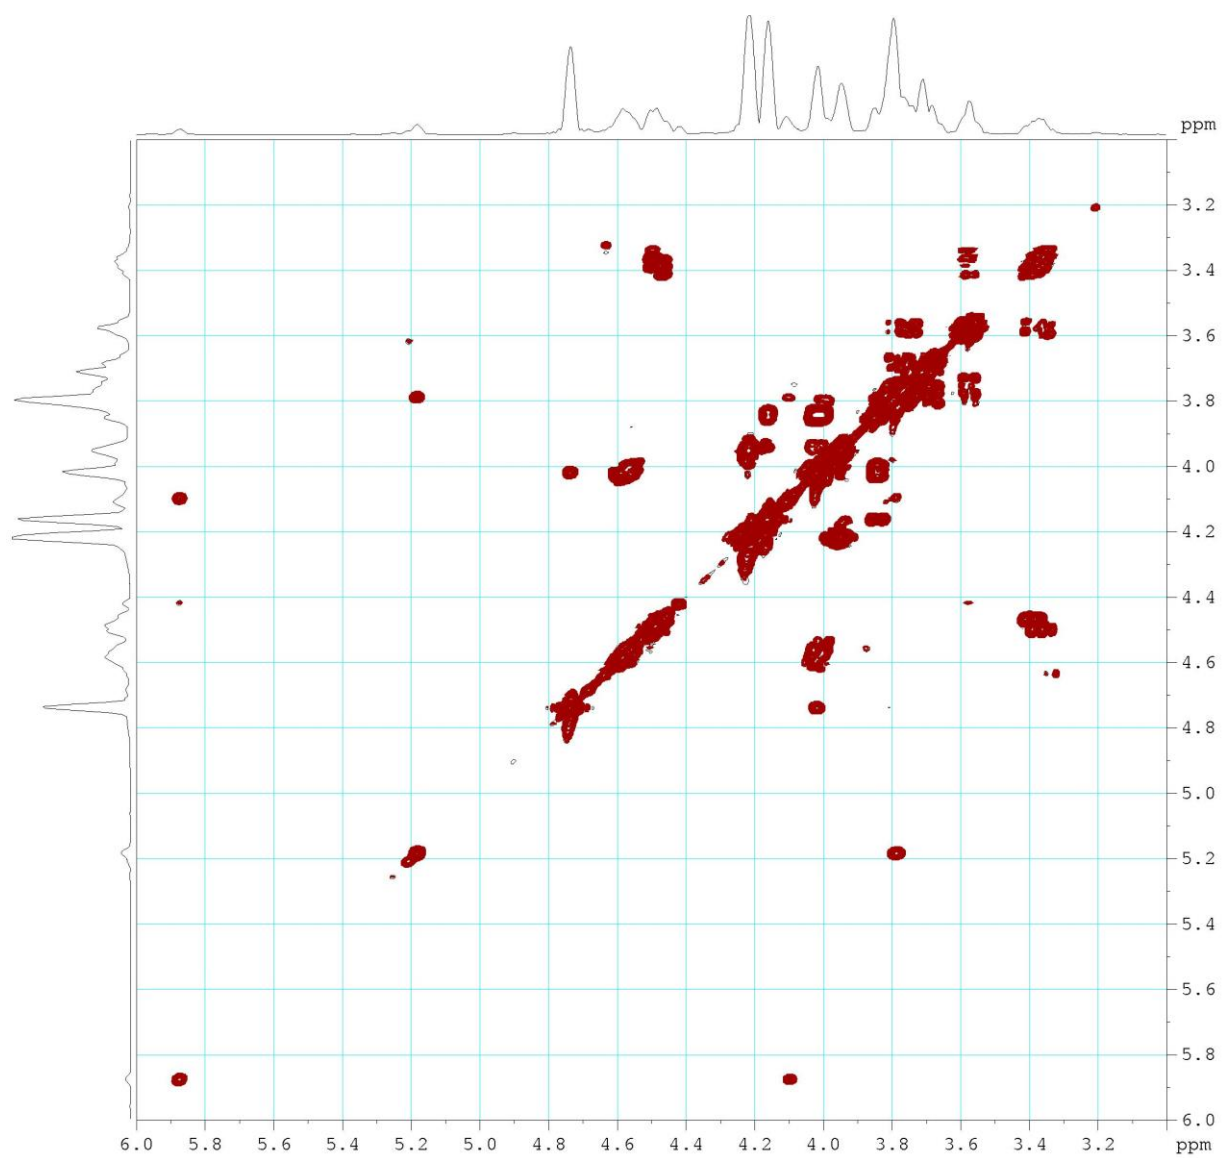

Figure S3. The  $^1\text{H}$ - $^1\text{H}$  COSY NMR spectrum of chondroitin sulfate SS.

**A**

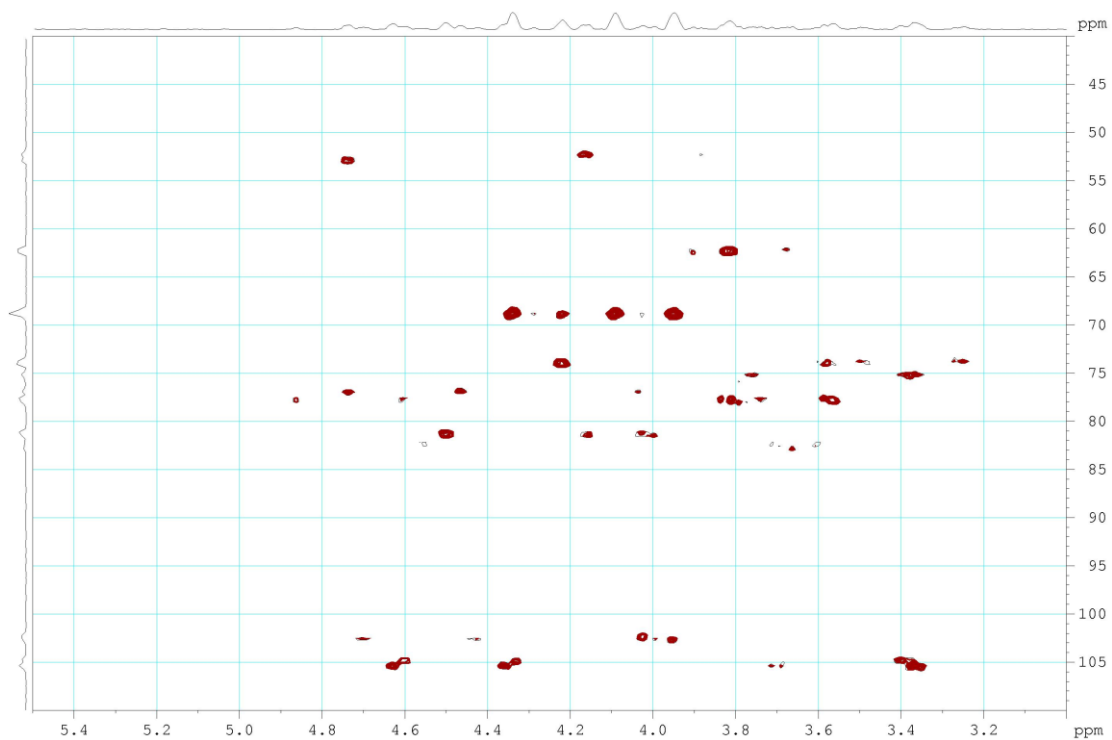

**B**

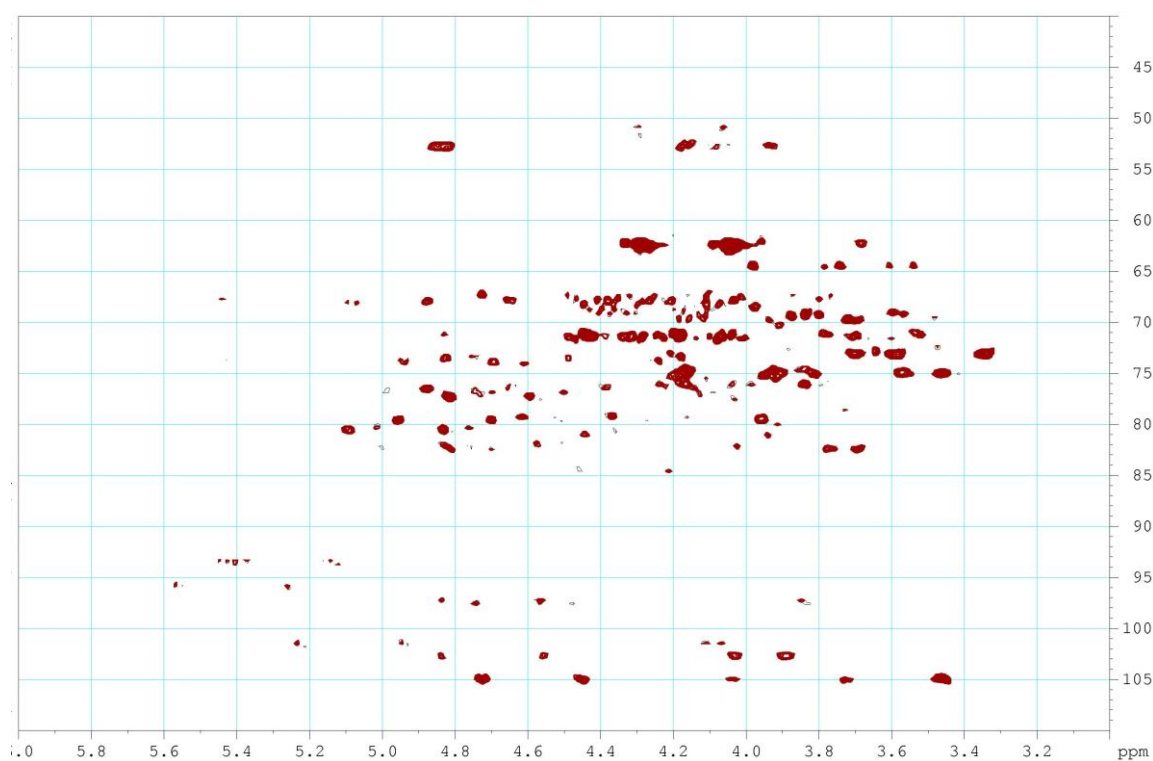

Figure S4. The HMBC spectra of chondroitin sulfate SS (A) and fucosylated chondroitin sulfate CD (B).

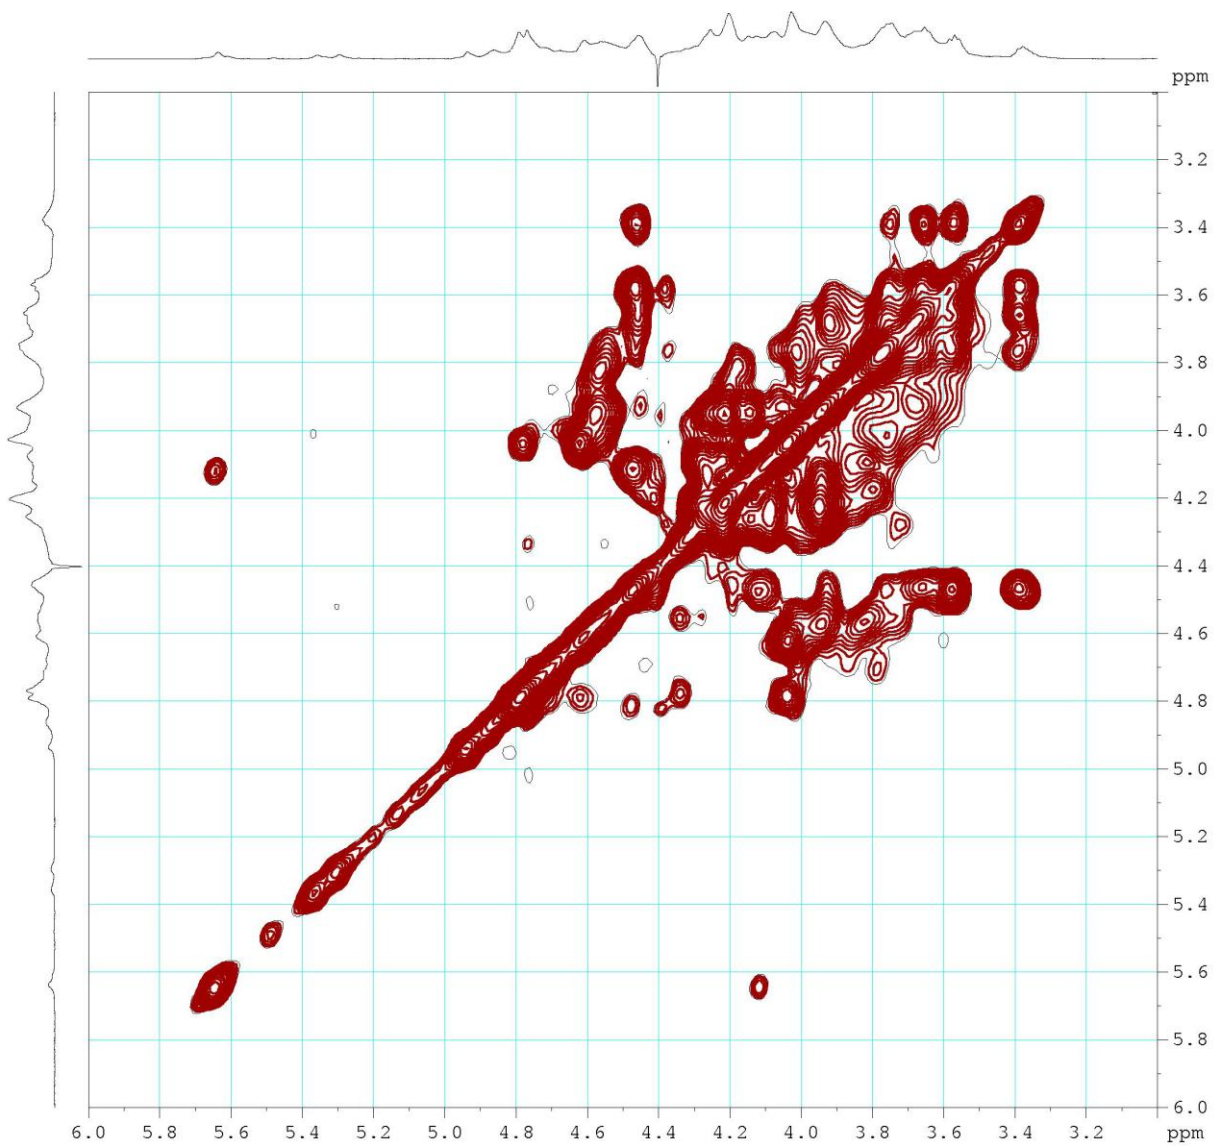

Figure S5. The  $^1\text{H}$ - $^1\text{H}$  TOCSY spectrum of fucosylated chondroitin sulfate CD.
